# Supplementary material
Source: MDPI journal article supplement (https://www.mdpi.com/2073-4344/7/10/288)
Supplement: s1 [file s1]

# Supplementary Materials: Polycyclic Ketone Monooxygenase (PockeMO): A Robust Biocatalyst for the Synthesis of Optically Active Sulfoxides

Gonzalo de Gonzalo <sup>1,\*</sup>, Maximilian J. L. J. Fürst <sup>2</sup> and Marco W. Fraaije <sup>2</sup>

<sup>1</sup> Departamento de Química Orgánica, Universidad de Sevilla, c/Profesor García González 1, 41012 Sevilla, Spain

<sup>2</sup> Molecular Enzymology Group, University of Groningen, Nijenborgh 4, 9747 AG Groningen, The Netherlands; m.j.l.j.furst@rug.nl (M.J.L.J.F.), m.w.fraaije@rug.nl (M.W.F.)

\* Correspondence: gdegonzalo@us.es; Tel.: +34-95-455-9997

Received: 12 August 2017; Accepted: 21 September 2017; Published: date

## S.1. Study of the Thioanisole Concentration Effect on the PockeMO-Catalytic Properties

Thioanisole **1a** (10, 50, 100 or 200 mM) was added to 1.0 mL Tris/HCl 50 mM (pH 8.0) containing NADPH (0.2 mM), sodium phosphite (1.0 equivalent) and PockeMO (1.0  $\mu$ M). The reactions were stirred at 25, 45 or 60 °C at 220 rpm for the times established. Once finished, the reactions were extracted with EtOAc (2 x 0.5 mL) and dried onto Na<sub>2</sub>SO<sub>4</sub>. The samples were directly analysed by GC/MS and HPLC in order to determine, respectively, the level of conversion, the percentage of chiral methyl phenyl sulfoxide (*R*)-**1b** and methyl phenyl sulfone **1c**, as well as the enantiomeric excesses of sulfoxide (*R*)-**1b**. Results are summarized in Table S.1.

**Table S1.** Enantiomeric excesses, conversions and space time yields obtained in the PockeMO-catalyzed sulfoxidation of thioanisole at different concentrations and temperatures.

| [ <b>1a</b> ] (mM) | T (°C) | t (h) | conversion (%) <sup>a</sup> | Space time yield (mmol L <sup>-1</sup> h <sup>-1</sup> ) | ee ( <i>R</i> )- <b>1b</b> (%) |
|--------------------|--------|-------|-----------------------------|----------------------------------------------------------|--------------------------------|
| 10                 | 25     | 16    | >97                         | 61.9                                                     | 88                             |
| 50                 | 25     | 16    | 45                          | 140.6                                                    | 89                             |
| 100                | 25     | 30    | 13                          | 43.3                                                     | 86                             |
| 200                | 25     | 48    | 7                           | 29.2                                                     | 85                             |
| 10                 | 45     | 8     | >97                         | 123.8                                                    | 87                             |
| 50                 | 45     | 20    | 96                          | 240.0                                                    | 86                             |
| 100                | 45     | 24    | 43                          | 179.2                                                    | 86                             |
| 200                | 45     | 24    | 17                          | 141.7                                                    | 84                             |
| 10                 | 60     | 7     | >97                         | 138.1                                                    | 82                             |
| 50                 | 60     | 24    | 92                          | 191.7                                                    | 80                             |
| 100                | 60     | 24    | 35                          | 145.8                                                    | 80                             |
| 200                | 60     | 24    | 11                          | 91.7                                                     | 79                             |

<sup>a</sup> For all the reactions studied, the amount of sulfone **1c** was below 5%.

## S.2. GC Analyses

GC Analyses were performed on a HP-5MS cross-linked methyl siloxane column (30 m x 0.25 mm x 0.25  $\mu$ m, 1.0 bar N<sub>2</sub>) and were used for the determination of the conversions and the amount of both sulfoxides **1-12b** and sulfones **1-12c** (Table S2). For all the compounds, the following program was employed: 50 °C (5 min), 10 °C/min, 200 °C (3 min).

**Table S2.** Determination of conversions and amounts of sulfoxides and sulfones by employing GC.

| Substrate | t <sub>R</sub> (min) Sulfide | t <sub>R</sub> (min) Sulfoxide | t <sub>R</sub> (min) Sulfone |
|-----------|------------------------------|--------------------------------|------------------------------|
| <b>1</b>  | 11.0                         | 15.1                           | 15.7                         |

|    |      |      |      |
|----|------|------|------|
| 2  | 12.2 | 16.2 | 16.9 |
| 3  | 15.4 | 18.7 | 19.5 |
| 4  | 16.5 | 18.9 | 19.5 |
| 5  | 14.9 | 18.6 | 19.3 |
| 6  | 14.1 | 17.1 | 17.7 |
| 7  | 14.1 | 17.2 | 17.7 |
| 8  | 13.9 | 16.6 | 17.0 |
| 9  | 12.5 | 17.0 | 17.7 |
| 10 | 18.9 | 21.8 | 22.3 |
| 11 | 19.5 | 21.9 | 22.5 |
| 12 | 12.8 | 15.8 | 16.6 |

### S.3. HPLC Analyses

For the determination of the enantiomeric excesses of compounds **1–12b** (Table S3), the following columns were employed: column A: Chiralcel OB (0.46 cm × 25 cm), column B: Chiralcel OD (0.46 cm × 25 cm) and column C: Chiralcel OJ-H (0.46 cm × 25 cm), all three from Daicel.

**Table S3.** Determination of enantiomeric excesses by HPLC.

| Substrate  | Column | Flow rate<br>(mL min <sup>-1</sup> ) | T (°C) | Eluent <sup>a</sup>       | Retention time (min) |
|------------|--------|--------------------------------------|--------|---------------------------|----------------------|
| <b>1b</b>  | B      | 1.0                                  | 30     | <i>n</i> -hexane-IPA 9:1  | 10.2 (R); 12.0 (S)   |
| <b>2b</b>  | B      | 1.0                                  | 30     | <i>n</i> -hexane-IPA 95:5 | 12.9 (R); 16.5 (S)   |
| <b>3b</b>  | B      | 1.0                                  | 30     | <i>n</i> -hexane-IPA 95:5 | 16.9 (R); 18.2 (S)   |
| <b>4b</b>  | C      | 1.0                                  | 30     | <i>n</i> -hexane-IPA 9:1  | 47.1 (R); 52.3 (S)   |
| <b>5b</b>  | B      | 1.0                                  | 30     | <i>n</i> -hexane-IPA 9:1  | 14.1 (R); 15.2 (S)   |
| <b>6b</b>  | A      | 1.0                                  | 30     | <i>n</i> -hexane-IPA 9:1  | 13.5 (S); 20.7 (R)   |
| <b>7b</b>  | A      | 1.0                                  | 30     | <i>n</i> -hexane-IPA 9:1  | 12.8 (S); 18.8 (R)   |
| <b>8b</b>  | A      | 1.0                                  | 30     | <i>n</i> -hexane-IPA 9:1  | 15.4 (S); 22.6 (R)   |
| <b>9b</b>  | B      | 1.0                                  | 30     | <i>n</i> -hexane-IPA 9:1  | 17.0 (R); 18.7 (S)   |
| <b>10b</b> | B      | 1.0                                  | 30     | <i>n</i> -hexane-IPA 95:5 | 26.1 (R); 29.0 (S)   |
| <b>11b</b> | B      | 0.5                                  | 30     | <i>n</i> -hexane-IPA 9:1  | 22.1 (R); 26.7 (S)   |
| <b>12b</b> | A      | 0.5                                  | 30     | <i>n</i> -hexane-IPA 9:1  | 14.7 (S); 17.1 (R)   |

<sup>a</sup> All the experiments were performed with isocratic eluent.

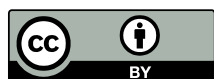

© 2017 by the authors. Submitted for possible open access publication under the terms and conditions of the Creative Commons Attribution (CC BY) license (<http://creativecommons.org/licenses/by/4.0/>).
